# Supplementary material
Source: PubMed Central journal article supplement (PMC2824367)
Supplement: 0905657107_pnas.200905657SI.pdf [file 0905657107_pnas.200905657SI.pdf]

# Supporting Information

10.1073/pnas.0905657107

## SI Materials and Methods

**Antibodies.** The antibodies used for immunofluorescence or Western blotting are as follows: pErk1/2 (Cell Signaling Technology), Erk1/2 (Cell Signaling Technology), Ras (Cell Signaling Technology), pMek1/2 (Cell Signaling Technology), Mek1/2 (Cell Signaling Technology), Rcn2 (Proteintech Group),  $\alpha$ -tubulin (Sigma), EGFP (Roche), Flag (Sigma), GATA-4 (Santa Cruz), Dab2 (BD), Nanog (Abcam for immunostaining), and His (Calbiochem). Antibodies against Oct4, Sox2, Nanog (for Western blot analysis), and serine/threonine kinase 40 (Stk40) were raised and affinity purified in our laboratory.

**Plasmids.** The cDNA sequence of mouse full-length Stk40 was amplified by RT-PCR using total RNA from CGR8 mouse embryonic stem cells (ESCs; Austin Smith and Ian Chambers) and cloned into pET-30a(+) (Novagen), pGEX-4T-1 (Amersham Biosciences), or pPyCAGIP vectors (Ian Chambers). Mouse full-length Rcn2 cDNA sequence was amplified by RT-PCR using total RNA from CGR8 ESCs and cloned into pGEX-4T-1 or pPyCAGIP vectors. Stk40-EGFP/pPyCAGIP or Rcn2-EGFP/pPyCAGIP was subcloned from Stk40/pEGFP-N1 or Rcn2/pEGFP-N1 (pEGFP-N1 vector was purchased from Clontech). Ras constitutively active form RasT35S [pCMV-Ras (G12V, T35S)] and dominant negative form RasS17N [pCMV-Ras (S17N); Hiroshi Koide] were subcloned into pPyCAGIP vectors. For construction of various luciferase reporter vectors, promoter 2-kb and 4-kb upstream fragments of *Stk40* were amplified using genomic DNA from CGR8 cells and cloned into pGL3-Basic vectors (Promega). The pPyCAGIP-TetR vector was previously described (1). Sequences of siRNA for *EGFP* (2), *Stk40* (gga ccc atc gga taa cta t), and *Rcn2* (gca gca gtt tgt gga gta t) were inserted into pTER+ vector (3) to generate RNAi *EGFP*, RNAi *Stk40*, or RNAi *Rcn2*, respectively. RBD (Ras binding domain; expanding residues from amino acid 51–131 on Raf-1) (4) was amplified by RT-PCR from total RNA from CGR8 cells and inserted into pGEX-4T-1 vector. The sequences of all constructs were verified by DNA sequencing.

**Chromatin Immunoprecipitation Assays.** CGR8 mouse ESCs were cross-linked with 1% formaldehyde, and the nuclear extracts were sonicated and incubated with control IgG or Oct4 antibody for immunoprecipitation in chromatin immunoprecipitation (ChIP) assays. The precipitated complexes were eluted and reverse cross-linked. The captured genomic DNA was obtained through ethanol precipitation and used for PCR analysis. Ten percent of total genomic DNA from the nuclear extract was used as input. The primers used are as follows: Rex1, 5'-GAG GTA CTG AGA TGT GAC TGA GTC TCA -3' (forward) and 5'-CTC CTT GGA CCC CTC CCT TTT TAG ATG-3' (reverse); Stk40, 5'-CTA GCC TTT TTG GAA CCC ACG AAA C-3' (forward) and 5'-GCT GGT CTT CAT AAT GAA GTC CCA G-3' (reverse).

**Identification of *Stk40* by ChIP Assay.** To identify new target genes of Oct4, affinity-purified rabbit polyclonal antibody against Oct4 was used to conduct ChIP assays using mouse ESC nuclear extract (CGR8 ESC line). The precipitated genomic DNA fragments were ligated into the pBluescript vector and subjected to DNA sequencing. The sequences were analyzed through the BLAST program, and potential target genes were identified. *Stk40* was one of the candidates.

**Embryoid-Body Formation.** ESCs were cultured in suspension in Petri dishes in ES growth medium without Leukemia inhibitory factor to form aggregates. At various time points, images were recorded, and the aggregates were harvested for RT-PCR, Western blot analysis, or histological analysis.

**RT-PCR and qPCR Analysis.** Total RNA was extracted using TRIzol reagent (Invitrogen), treated with RNase-free DNase (Promega), and transcribed into cDNA using oligo (dT)<sub>15</sub> and ReverTra Ace reverse transcriptase (TOYOBO) as previously described (5). For qPCR, raw data were obtained on an ABI PRISM 7900 using fluorogenic SYBR Green I double-stranded DNA-binding dye chemistry (ABI) as previously described (5). The primers used for RT-PCR and qPCR are provided in Table S3.

**Western Blot Analysis.** Cell extracts or samples from immunoprecipitation or GST pull-down assays were resolved on SDS/PAGE and transferred to Protran nitrocellulose membranes (Schleicher & Schuell). After blocking with 5% skim milk (5% BSA for pErk1/2 and Erk1/2) in Tris-Buffered Saline with Tween-20 (TBST) for 1 h, the membranes were incubated with primary antibodies overnight at 4°C. After washing with TBST, the membranes were incubated with horseradish peroxidase-conjugated secondary antibody (Jackson) for 2 h at room temperature. Bands were detected using an ECL Western blotting detection kit (Pierce). The Western blot analysis was performed in at least three independent experiments, and representative data are shown.

**Luciferase Reporter Assays.** CGR8 or ZHBTc4 ESCs ( $1.2 \times 10^5$ ) were incubated in 24-well tissue-culture plates for 24 h. Tetracycline (Tc) at a concentration of 0.5  $\mu$ g/mL was added to the media of ZHBTc4 ESCs to induce down-regulation of *Oct4* expression. Each reporter construct (200 ng for pGL3 Basic and equimolar amounts for the other reporters) was cotransfected with vector pRL-TK (10 ng; Promega) as an internal control using LipofectAMINE2000 (Invitrogen). Cell extracts were prepared 48 h after transfection, and luciferase activities were evaluated using a dual-luciferase assay system (Promega). The luciferase activity of each construct was calculated relative to that of control vector pGL3-Basic. All transfection experiments were conducted in duplicate at least three times. The luciferase activities are reported as means  $\pm$  SD.

**In Vitro Protein-DNA Binding Assays.** The oligonucleotide probes were synthesized and labeled with biotin at the 5' end of the forward oligonucleotide. The complementary reverse sequence was synthesized and annealed with the biotin-labeled oligomer in 10 mM Hepes (pH 7.8), 10 mM MgCl<sub>2</sub>, and 0.1 mM EDTA by heating at 65°C for 5 min followed by gradually cooling to room temperature. Double-stranded DNA formation was verified using 3% agarose gel electrophoresis. Then, 0.5- $\mu$ g biotin-labeled DNA probes were incubated with 1 mg nuclear extract from F9 EC cells at a final concentration of 1 mg/mL at 4°C overnight. The reaction mixture was centrifuged at 2000  $\times$  g at 4°C to remove debris. Simultaneously, the streptavidin Sepharose high performance beads (GE Healthcare) were washed three times with binding buffer. The mixture of DNA-protein complexes was added to 20  $\mu$ L of 100% beads. The binding reaction was conducted for 3 h at 4°C. At the end of the reaction, the mixture was centrifuged at 500  $\times$  g at 4°C for 5 min. After the beads were extensively washed, the samples from the precipitates were subjected to 10% SDS/PAGE, and Oct4-binding DNA was vi-

sualized with Western blotting using the Oct4 antibody. Probe sequences used were as follows: *Stk40* (wt) probe, 5'-CTC TAA AAG TGC CTC ATT TTG CAT AAG ACA GGG CCT TAG G-3' (forward) and 5'-CCT AAG GCC CTG TCT TAT GCA AAA TGA GGC ACT TTT AGA G-3' (reverse); *Stk40* (mut) probe, 5'-CTC TAA AAG TGC CTC ATT GTT CCT AAG ACA GGG CCT TAG G-3' (forward) and 5'-CCT AAG GCC CTG TCT TAG GAA CAA TGA GGC ACT TTT AGA G-3' (reverse); *Fgf4* probe, 5'-GAA AAC TCT TTG TTT GGA TGC TAA TGG GAT ACT TAA A-3' (forward) and 5'-TTT AAG TAT CCC ATT AGC ATC CAA ACA AAG AGT TTT C-3' (reverse); *Ulf-1* probe, 5'-GAG CCC TCA TTG TTA TGC TAG TGA AGT GCC GGC AGC A-3' (forward) and 5'-TGC TGC CGG CAC TTC ACT AGC ATA ACA ATG AGG GCT C-3' (reverse); negative control (NC) probe, 5'-CCA AGT ACC TGG AAC TCC GGT AGT ACC TGG AAC TCC GGA TGC -3' (forward) and 5'-GCA TCC GGA GTT CCA GGT ACT ACC GGA GTT CCA GGT ACT TGG -3' (reverse).

**Colony-Forming Assays.** E14T ESCs expressing vector or full-length *Stk40* were trypsinized to obtain single-cell suspensions, and 10,000 cells were plated per 10-cm cell culture dish. After 10 days, culture plates were stained using an alkaline phosphatase substrate kit (VECTOR), and colonies were scored according to categories: pure, mixed, or fully differentiated colonies.

**Chimeric Embryoid Body Formation Assays.** ESCs expressing *Stk40* were labeled with DiI red fluorescent dye (Molecular Probes) and mixed with undifferentiated ESCs in an approximate ratio of 1:2–1:1. The mixture was allowed to form spheroids for 4–8 days. To trace the labeled cells, the EBs were frozen-sectioned and visualized using fluorescence microscopy.

**Retinoid Acid-Induced Extraembryonic-Endoderm Differentiation in F9 Cells.** A Tc-inducible *Stk40* RNAi system was constructed in F9 EC cells as described previously (1). F9 cells were plated at a density of 10,000 cells per well in 6-well plates coated with gelatin. Tc (0.5  $\mu$ g/mL) was included in the medium as indicated at the same time followed by the addition of 25 nM retinoid acid (RA; an equal volume of ethanol can also be used as a negative control) after 24 h. After additional 4 days, the cells were lysed in TRIzol and subjected to RT-PCR analysis.

**GST-RBD Pull-Down Assays to Detect Activated Ras (GTP-Bound).** GST-RBD fusion proteins were expressed in *Escherichia coli* (BL21) and purified according to the manufacturer's instructions (GE Healthcare). Whole-cell lysate was extracted from ESCs with radio immunoprecipitation assay buffer (50 mM Tris-HCl, 150 mM NaCl, 0.1% SDS, 1% Nonidet P-40, 0.5% sodium deoxycholate, 1 mM NaF, 1 mM sodium orthovanadate, and 1 mM phenylmethylsulfonyl fluoride) and normalized using a bicinchoninic acid kit (Pierce). For each reaction, an equal amount of lysate (1 mg or more supplemented with RIPA buffer to equal volumes) was incubated with 10  $\mu$ g Glutathione Sepharose 4B (GE Healthcare)-bound GST-RBD recombinant protein at 4°C overnight. Subsequently, the GST beads were washed with RIPA buffer, and the precipitates were boiled in 1  $\times$  SDS loading buffer for 10 min. The supernatants were applied to SDS/PAGE. RBD pulled-down activated Ras and total Ras in the inputs were visualized by Western blot analysis with anti-Ras antibody.

**Fusion Protein Expression and Affinity Purification.** GST fusion proteins were expressed and purified according to the manufacturer's instructions (GE Healthcare). GST or GST-*Stk40* proteins were bound to Glutathione Sepharose 4B (GE Healthcare) in equimolar amounts. Beads were incubated overnight at 4°C with the whole-cell extract from F9 EC cells. Bound proteins were washed and boiled in SDS/PAGE loading

buffer. After electrophoresis, the gel was stained with Coomassie blue. Bands, present only in the GST-*Stk40* with F9 whole-cell lysate column, were excised for mass spectrometric analysis (6).

**GST Pull-Down and Coimmunoprecipitation Assays.** GST and His fusion proteins were expressed and purified according to the manufacturer's instructions (GE Healthcare and Novagen, respectively). Subsequently, 0.5  $\mu$ g of GST fusion proteins were incubated with 0.5  $\mu$ g of His fusion proteins in 500  $\mu$ L of tris-buffered saline-NP40 (TBS-N) [20 mM Tris-HCl (pH 7.6), 200 mM NaCl, and 0.1% Nonidet P-40] at 4°C for 2 h followed by the addition of Glutathione Sepharose 4B (GE Healthcare) for 1 h. For coimmunoprecipitation, cells were washed in the culture dish with cold PBS three times. Whole-cell lysates were prepared in Co-IP (Immunoprecipitation) buffer [50 mM Tris-HCl (pH 7.5), 150 mM NaCl, 0.5% Nonidet P-40, 2 mM EDTA, 1 mM NaF, 1 mM Na<sub>3</sub>VO<sub>4</sub>, 10% glycerol, and 1 mM phenylmethylsulfonyl fluoride]. After vortexing and centrifugation, the supernatant was incubated with anti-Flag M2 affinity beads (Sigma) overnight at 4°C. The samples from immunoprecipitation or GST pull-down assays were studied using Western blot analysis.

**Immunofluorescence Staining.** ESCs were grown on glass coverslips (Fisher Scientific) and stained as previously described (6). Embryos were fixed with 4% paraformaldehyde and imbedded in optimum cutting temperature compound (Sakura Finetek) to produce frozen sections for immunostaining.

**Production of Chimeric Embryos.** E14Tg ESCs constitutively expressing the H2B-GFP fusion gene were used for visualizing the in vivo contribution of the injected cells. To obtain chimeric embryos, *Stk40*/E14Tg or *vector*/E14Tg control cells were injected into E3.5 B6D2F1 blastocysts, which were transferred into the uteri of day 2.5 pseudopregnant Institute of Cancer Research females. Embryos were dissected at E6.5 and E7.5, and the fluorescent signals were detected by confocal microscopy (TCS SP5; Leica). As for the chimeric embryos injected with the *Oct4* knocked down ESCs, the E14Tg ESCs were transfected with *Oct4* RNAi oligos (sequence 1 and 2 are provided in Table S4) and the control oligo for 72 h, respectively, and then, they were subjected to blastocyst injection.

**Statistical Analysis.** All values are shown as means  $\pm$  SD of the mean. The Student's *t* test was used to determine the significance of differences in comparisons. Values of  $P \leq 0.05$  were considered statistically significant.

## SI Text

**Oct4 Is Recruited to the *Stk40* Regulatory Region, and an Intact Octamer Motif Is Required for Oct4 Binding.** An in vitro DNA-protein binding assay showed that Oct4 bound the *Stk40* regulatory sequence but not a negative control probe (Fig. S1F). Notably, binding of Oct4 to the *Stk40* regulatory region was significantly weakened when the octamer motif was mutated, revealing that an intact octamer motif is required for Oct4 binding to the *Stk40* regulatory sequence.

**Forced Expression of *Stk40* Induces ESC Differentiation into Extraembryonic-Endoderm Lineages.** Transcript levels of *Coup-TF II* and *Afp* (primitive and visceral endoderm markers), *Tr* and *ApoE* (visceral endoderm markers), *Sparc*, *Laminin B1*, and *tPA* (parietal endoderm markers) were markedly higher in the *Stk40*-overexpressed cells (Fig. S2E). This evidence supports the existence of differentiated cells at different stages of extraembryonic-endoderm (ExEn) lineage development in *Stk40*-overexpressed cells.

Cells peeling off from EBs of *Stk40*-expressing cells displayed the ExEn cell-like morphology and expressed *Gata6*, *Sox7*, and *Laminin B1* as well as *Dab2* (Fig. S2 G–I).

Furthermore, we established a stable Tc-inducible *Stk40* RNAi system in F9 embryonal carcinoma (EC) cells, which have been often used as a model to study RA-induced ExEn differentiation (7). Knockdown of *Stk40* expression in these cells drastically decreased expression of *Dab2*, *Gata6*, and *Sox7* induced by RA (Fig. S2L). Overall, these findings clearly indicate that *Stk40* is an important player in ExEn lineage specification during ESC differentiation.

To further define the cells injected into host blastocysts, we stained sections of chimeric embryos containing histone2B GFP-expressing cells. As shown in Fig. S2M, one injected *Stk40*-expressing cell (green nucleus) migrated to the ExEn layer of yolk sacs in chimera, expressing *Gata4* in the nucleus of the same cell. In contrast, *Oct4* was detected in the epiblast cells, anterior to the injected cell. Expression of *Gata4* in the *Stk40*-expressing cells proves the ExEn identity of the injected cell at a molecular level in addition to its position during early embryonic development.

- Wang BB, Lu R, Wang WC, Jin Y (2006) Inducible and reversible suppression of Npm1 gene expression using stably integrated small interfering RNA vector in mouse embryonic stem cells. *Biochem Biophys Res Commun* 347:1129–1137.
- Li H, et al. (2007) Wwp2-mediated ubiquitination of the RNA polymerase II large subunit in mouse embryonic pluripotent stem cells. *Mol Cell Biol* 27:5296–5305.
- van de Wetering M, et al. (2003) Specific inhibition of gene expression using a stably integrated, inducible small-interfering-RNA vector. *EMBO Rep* 4:609–615.
- de Rooij J, Bos JL (1997) Minimal Ras-binding domain of Raf1 can be used as an activation-specific probe for Ras. *Oncogene* 14:623–625.
- Zhang Z, Liao B, Xu M, Jin Y (2007) Post-translational modification of POU domain transcription factor Oct-4 by SUMO-1. *FASEB J* 21:3042–3051.
- Xu HM, et al. (2004) Wwp2, an E3 ubiquitin ligase that targets transcription factor Oct-4 for ubiquitination. *J Biol Chem* 279:23495–23503.
- Krawetz R, Kelly GM (2008) Moesin signaling induces F9 teratocarcinoma cells to differentiate into primitive extraembryonic endoderm. *Cell Signal* 20:163–175.

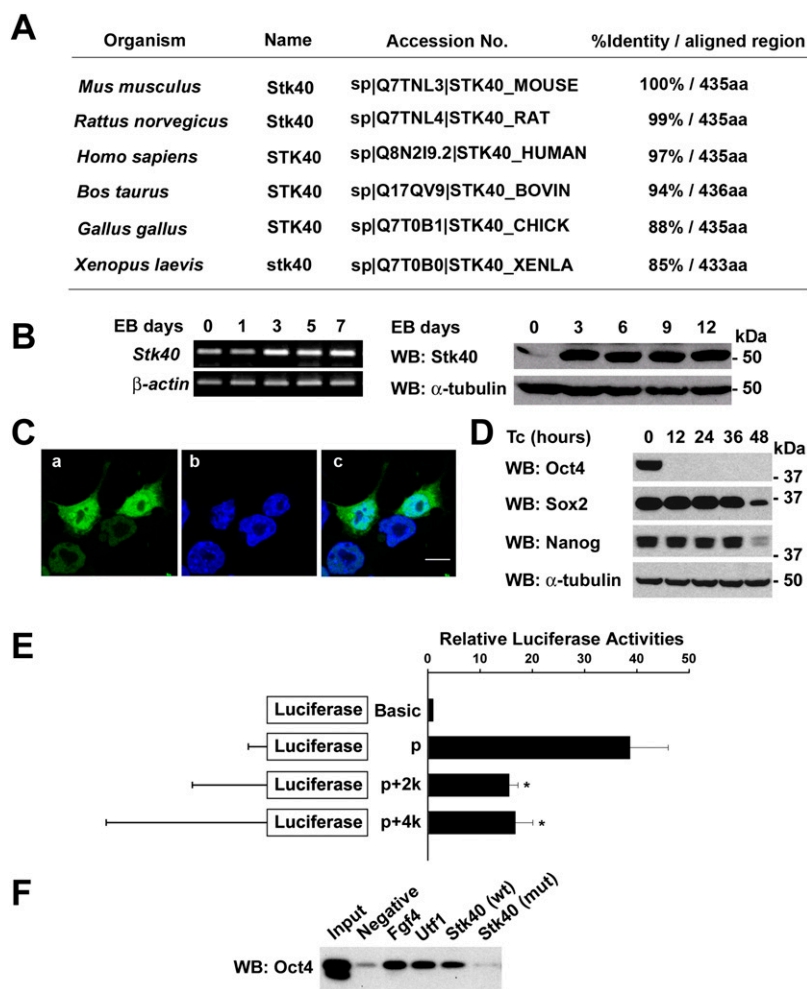

**Fig. S1.** (A) Alignment of the *Stk40* orthologs across multiple organisms. (B) *Stk40* expression during EB formation. E14T ESCs were cultured in suspension to form EBs for the indicated time points, and *Stk40* expression levels were analyzed by semiquantitative RT-PCR (Left) and Western blotting (Right). (C) Confocal images of *Stk40*–EGFP fusion protein distribution in E14T ESCs. Images were recorded from E14T ESCs transfected with *Stk40*–EGFP expression plasmid. EGFP (a), DAPI (b), and a composite image (c) are shown. (Scale bar: 10  $\mu$ m.) (D) Western blot analysis of pluripotency factors Oct4, Sox2, and Nanog in ZHBTc4 ESCs treated with Tc at indicated time points. (E) Luciferase assays with reporter constructs containing the regulatory sequence of *Stk40* in CGR8 ESCs. Luciferase activities are shown as relative values to pGL3-Basic (Basic defined as 1). p, the reporter construct containing the putative promoter sequence of *Stk40*; p+2k, 2-kb upstream sequences of *Stk40*; and p+4k, 4-kb upstream sequences of *Stk40*. All values are shown as means  $\pm$  SD of results from three independent experiments. \* $P < 0.05$ . (F) In vitro binding assays using indicated biotin-labeled probes with nuclear extract from F9 EC cells.





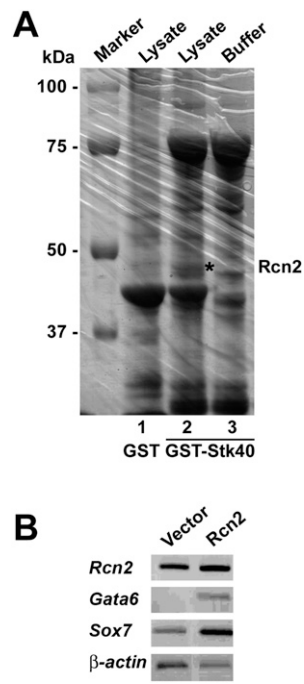

**Fig. 54.** (A) Identification of Rcn2 as a protein partner of Stk40 by GST or GST-Stk40 chromatography. Coomassie-blue staining of an SDS/PAGE gel containing the proteins purified is shown. (B) Overexpression of *Rcn2* induces ESC differentiation. RT-PCR analysis of ExEn marker expression in E14T cells overexpressing vector or *Rcn2* is shown.



shown. (Scale bar: 250  $\mu\text{m}$ .) (*Inset*) Enlarged view at the distal part of ExEn layers covering the epiblast. (Scale bar: 25  $\mu\text{m}$ .) (C) Immunofluorescent staining of Rcn2 and Oct4 in the mouse embryo at the blastocyst stage (E3.5). [Scale bar: 50  $\mu\text{m}$  (*Upper*); scale bar: 25  $\mu\text{m}$  (*Lower*).] (D) Immunofluorescent images of Rcn2 proteins in *vector*- or *Stk40*- expressed E14T cells. (Scale bar: 50  $\mu\text{m}$ .) (E) *Stk40*-expressing cells migrate to the ExEn layer and express Rcn2. Confocal images of an injected GFP-positive cell and immunostaining of Rcn2 in chimeric embryos at E6.5 from *Stk40*/E14Tg ESCs injection. (Scale bar: 75  $\mu\text{m}$ .) (*Inset*) Enlarged view of the distal extraembryonic yolk sac region. Arrow indicates one injected GFP-positive cell. (Scale bar: 10  $\mu\text{m}$ .)

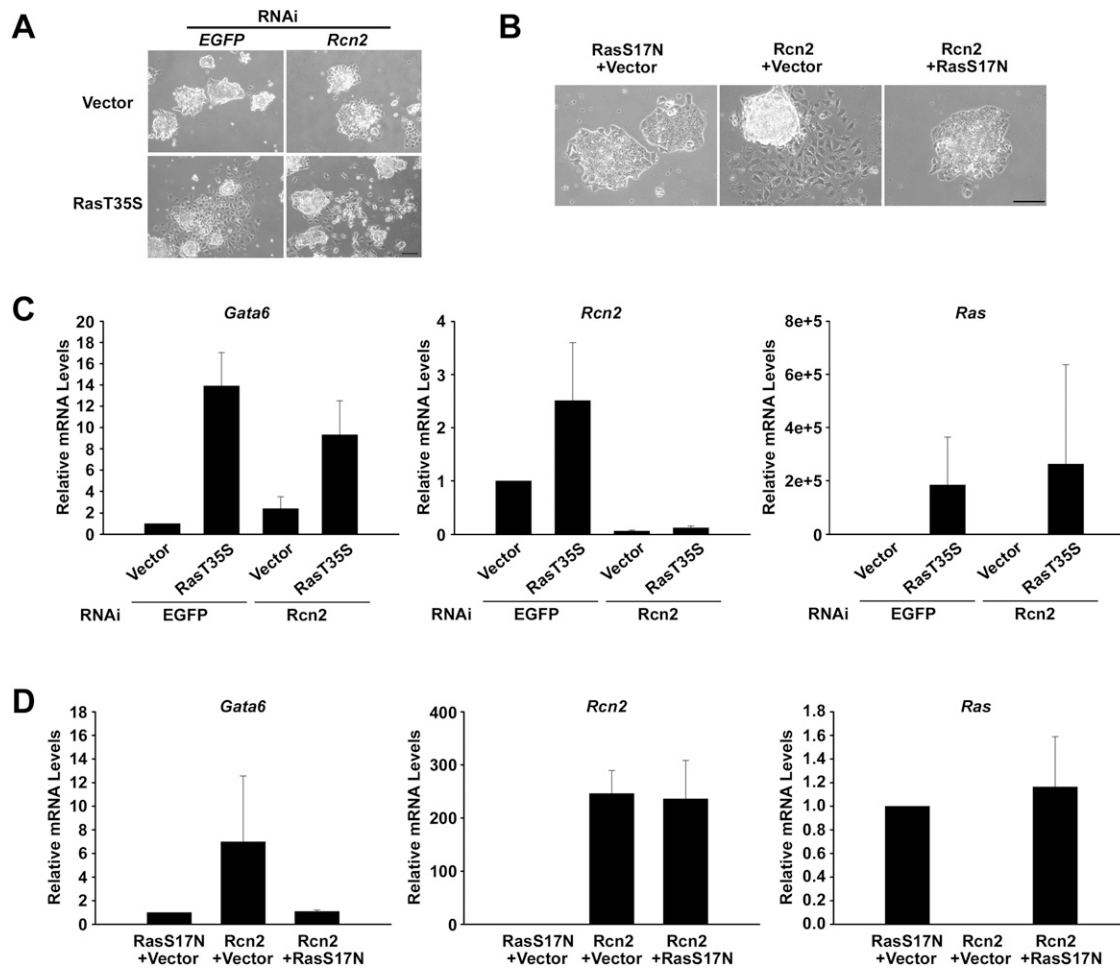

**Fig. S6.** (A) Knockdown of *Rcn2* partially blocks *RasT35S*-induced ESC differentiation. Phase-contrast images of *Vector*- or *RasT35S* overexpression in the stable *EGFP* or *Rcn2* RNAi E14T ESCs are shown. (Scale bar: 100  $\mu\text{m}$ .) (B) *RasS17N* blocks *Rcn2*-induced ESC differentiation. Phase-contrast images of E14T ESCs overexpressing indicated genes are shown. (Scale bar: 100  $\mu\text{m}$ .) (C and D) Gene expression levels in the cells described in A and B were analyzed by qPCR. All values are shown as means  $\pm$  SD of results from at least three independent experiments.

**Table S1. Analysis of chimeric embryos of *Stk40* overexpressed E14Tg cells**

| Injected cell line name | Stage of embryos | Number of deciduas | Number of embryos | Number of chimeras |          |
|-------------------------|------------------|--------------------|-------------------|--------------------|----------|
|                         |                  |                    |                   | Embryonic          | ExEn     |
| Vector/E14Tg            | E6.5             | 55                 | 48                | 30                 | 2        |
|                         | E7.5             | 16                 | 14                | 6                  | 0        |
|                         | Total            | 71                 | 62 (87%)          | 36 (51%)           | 2 (3%)   |
| <i>Stk40</i> /E14Tg     | E6.5             | 86                 | 75                | 0                  | 32       |
|                         | E7.5             | 33                 | 30                | 0                  | 5        |
|                         | Total            | 119                | 105 (88%)         | 0                  | 37 (31%) |



**Table S2. Analysis of chimeric embryos of Oct4 knocked-down E14Tg cells**

| Injected cell line name | Embryos with positive signals | Predominant distribution |          |
|-------------------------|-------------------------------|--------------------------|----------|
|                         |                               | Embryonic                | ExEn     |
| Negative control        | 13                            | 9 (69%)                  | 4 (31%)  |
| Oct4 RNAi Oligo 1       | 41                            | 11 (27%)                 | 30 (73%) |
| Oct4 RNAi Oligo 2       | 40                            | 12 (30%)                 | 28 (70%) |

**Table S3. Names and sequences of the primers for RT-PCR assays**

| Gene name            | Primer sequence                                                               |
|----------------------|-------------------------------------------------------------------------------|
| <i>Oct4</i>          | Forward: 5'-atggcactactgtggacctca-3' reverse: 5'-agcagcttggcaactgttc-3'       |
| <i>Nanog</i>         | Forward: 5'-ctcatcaatgcctgcagttttca-3' reverse: 5'-ctcctcaggccctgtcagc-3'     |
| <i>Rex1</i>          | Forward: 5'-acgaggtgagttttccgaac-3' reverse: 5'-cctctgtcttcttctgttc-3'        |
| <i>Gata6</i>         | Forward: 5'-gctgaacggaacgtaccacc-3' reverse: 5'-acagtggcgtctggatggag-3'       |
| <i>Gata4</i>         | Forward: 5'-cctggaagaccccaatctc-3' reverse: 5'-aggtagtgtcccctccatct-3'        |
| <i>Sox7</i>          | Forward: 5'-gacaccttgatcagctaagcc-3' reverse: 5'-cctccagctctatgacacactg-3'    |
| <i>Laminin B1</i>    | Forward: 5'-cccgaatctctgtgaacctg-3' reverse: 5'-gcaattgacaccgactga-3'         |
| <i>Afp</i>           | Forward: 5'-attcctcccagtcgtgac-3' reverse: 5'-cagcagcctgagagtcct-3'           |
| <i>mHox</i>          | Forward: 5'-tggcggcacaagcagacgaaag-3' reverse: 5'-gtgaggttccaccgactgagcaga-3' |
| <i>T (Brachyury)</i> | Forward: 5'-ggtgctgttctctgtgtgc-3' reverse: 5'-gtaggtgggctgctgtat-3'          |
| <i>Bmp4</i>          | Forward: 5'-aaaagtcgccgagattcag-3' reverse: 5'-cggtaaagatccctcatgtaa-3'       |
| <i>Hand1</i>         | Forward: 5'-gggctgctgaggaactc-3' reverse: 5'-gccaaggatgcacaagca-3'            |
| <i>Fgf5</i>          | Forward: 5'-aaagtcaatggctcccagaa-3' reverse: 5'-ggcacttgcatggagtttcc-3'       |
| <i>Nestin</i>        | Forward: 5'-tgagggtcaggtgttctg-3' reverse: 5'-agagcaggaggaggacattc-3'         |
| <i>Cdx2</i>          | Forward: 5'-cagcagtcctaggaagcaa-3' reverse: 5'-gtgtggcagccagctcactt-3'        |
| <i>Mash2</i>         | Forward: 5'-gggatctgactcagagattt-3' reverse: 5'-cgtccatcaagcttgcattca-3'      |
| <i>Dab2</i>          | Forward: 5'-ggcaacaggctgaaccattag-3' reverse: 5'-ttggtgtcatttcagagtttagat-3'  |
| <i>Ihh</i>           | Forward: 5'-acgtgattgctctgtcaagt-3' reverse: 5'-ctggaaagctcagccggtt-3'        |
| <i>Stk40</i>         | Forward: 5'-gcaaggaatagagagccaag-3' reverse: 5'-taccatccgaccagactctg-3'       |
| <i>Rcn2</i>          | Forward: 5'-ggctgttcaggcagcttcatc-3' reverse: 5'-ctgggtcttatttgcagttgg-3'     |
| $\beta$ -actin       | Forward: 5'-ttccttctgggtatggaat-3' reverse: 5'-gagcaatgatcttgccttc-3'         |
| <i>Hras</i>          | Forward: 5'-tgccatcaacaaccaagt-3' reverse: 5'-atctcacgaccaacgtgta-3'          |

**Table S4. Oct4 stealth RNAi oligo sequences**

| Gene name                 | Primer sequence                                                          |
|---------------------------|--------------------------------------------------------------------------|
| Oct4 stealth RNAi Oligo 1 | Forward: ACCUUCUCCAACUUCACGGCAUUGG<br>Reverse: CCAAUGCCGUGAAGUUGGAGAAGGU |
| Oct4 stealth RNAi Oligo 2 | Forward: AUGCUAGUUCGUUUCUUCUCCGGG<br>Reverse: CCCGGAAGAGAAAGCGAACUAGCAU  |

Oct4 stealth RNAi oligo and stealth RNAi negative control high GC oligo (12935-400) were purchased from Invitrogen.
